# Supplementary material for: Facile preparation of an immobilized surfactant-free palladium nanocatalyst for metal hydride trapping: a novel sensing platform for TXRF analysis
Source: Royal Society of Chemistry journal article supplement (doi:10.1039/c4nr05755d), 2014-12-16

## Electronic Supplementary Information (ESI)

### **Facile preparation of immobilized surfactant-free palladium nanocatalyst for metal hydride trapping: a novel sensing platform for TXRF analysis**

**V. Romero, I. Costas-Mora, I. Lavilla and C. Bendicho\***

*Departamento de Química Analítica y Alimentaria, Área de Química Analítica; Facultad de Química, Universidad de Vigo, Campus As Lagoas-Marcosende s/n, 36310 Vigo, Spain. E-mail: bendicho@uvigo.es; Fax: +34-986-812556; Tel: +34-986-812281*

**Fig. S1** TEM images for Pd NPs synthesized using water:ethanol mixture 1:2 (v/v) (a) in the absence of MPTMS (b) in the presence of MPTMS 2 molar excess.

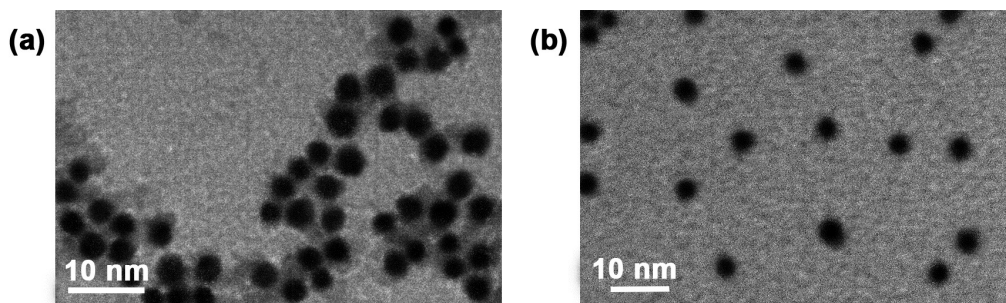

**Fig. S2** Effect of the trapping time on the analytical signal of the TXRF sensor

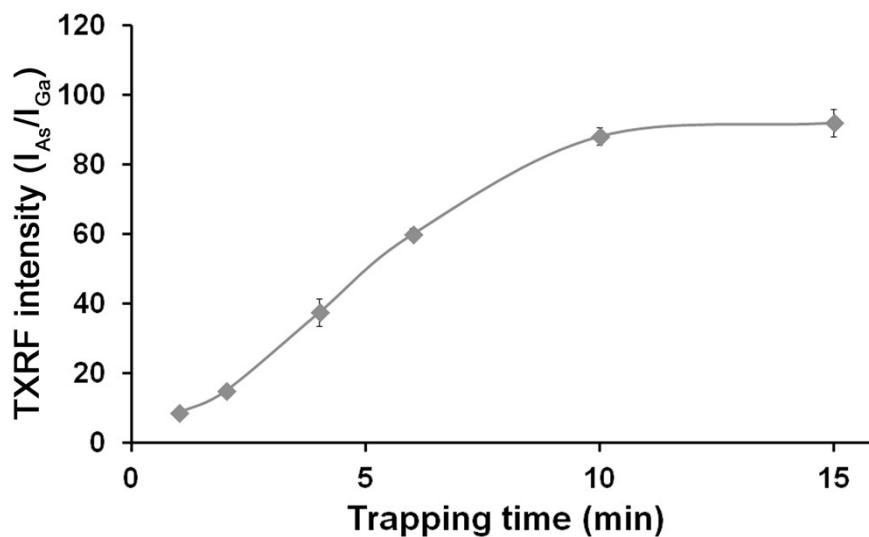

**Fig. S3** (a) Absorbance-time profiles obtained in ETAAS experiments for various initial concentrations of As ( $20 \mu\text{g L}^{-1}$ ,  $40 \mu\text{g L}^{-1}$ ,  $50 \mu\text{g L}^{-1}$ ,  $70 \mu\text{g L}^{-1}$ ,  $80 \mu\text{g L}^{-1}$ ,  $100 \mu\text{g L}^{-1}$ ). (b) Absorption profile of As in the absence (—) and in the presence (---) of Pd NPs.

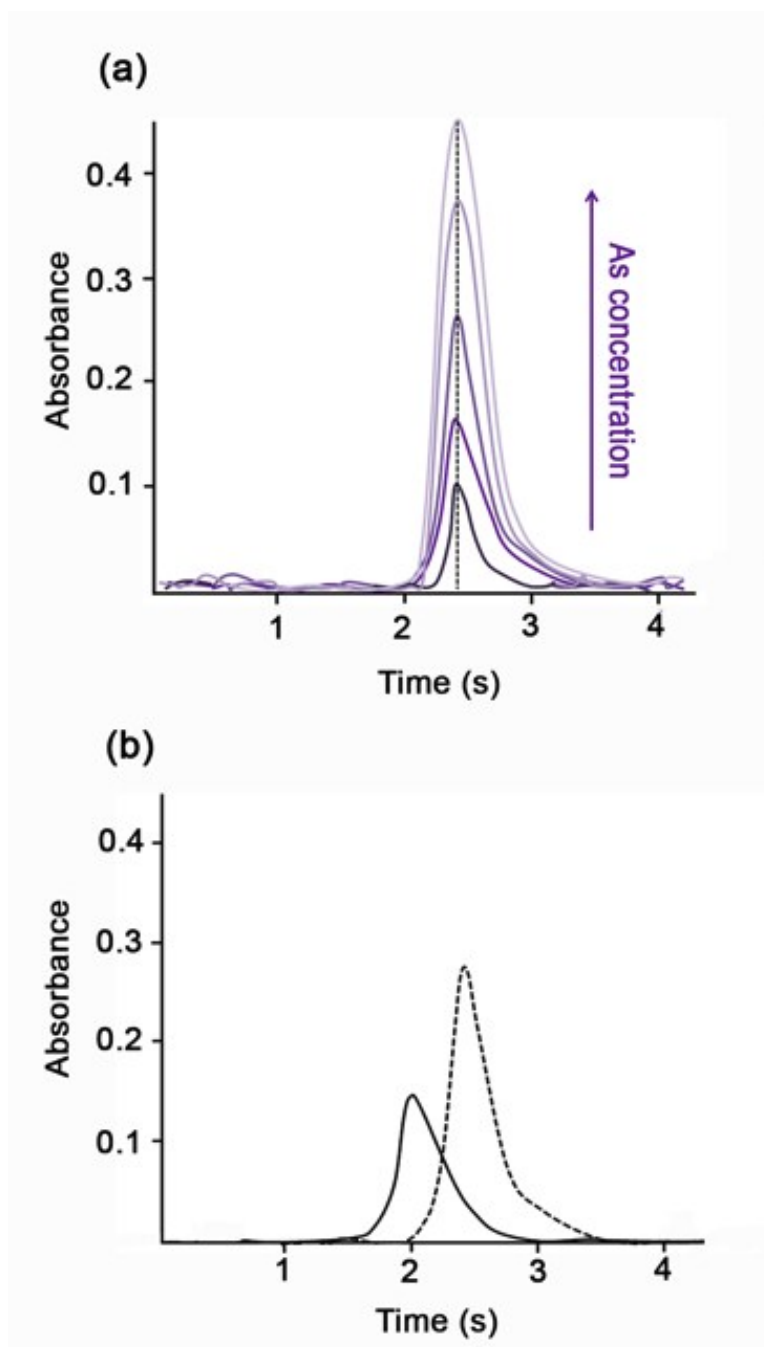

**Fig. S4** Schematic diagram showing the sensing platform for TXRF analysis: (a) Arsenic trapping by dissociative chemisorption of  $\text{AsH}_3$ ; (b) Detection of the trapped arsenic.

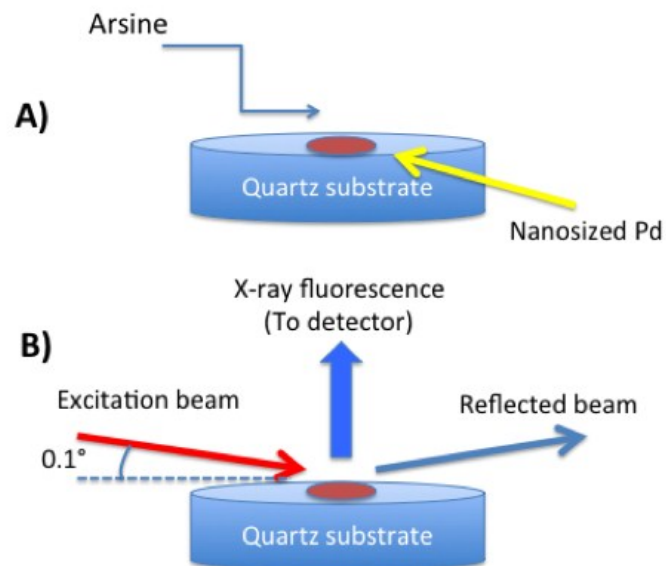

Supplement: c4nr05755d1.pdf [file c4nr05755d1.pdf]
